# Supplementary material for: Physiotherapists and Osteopaths’ Attitudes: Training in Management of Temporomandibular Disorders
Source: MDPI journal article supplement (doi:10.3390/dj10110210), 2022-11-04

Sesso-Gender 408 risposte

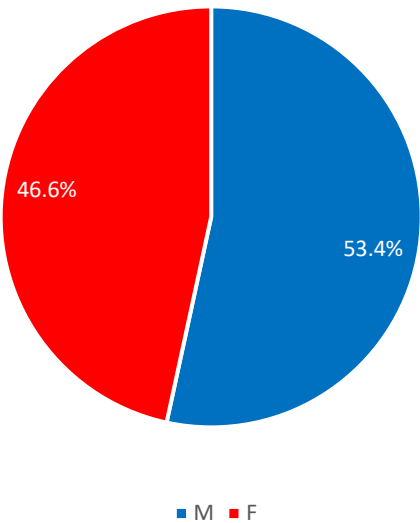

Domicilio-Where do you live? 407 risposte

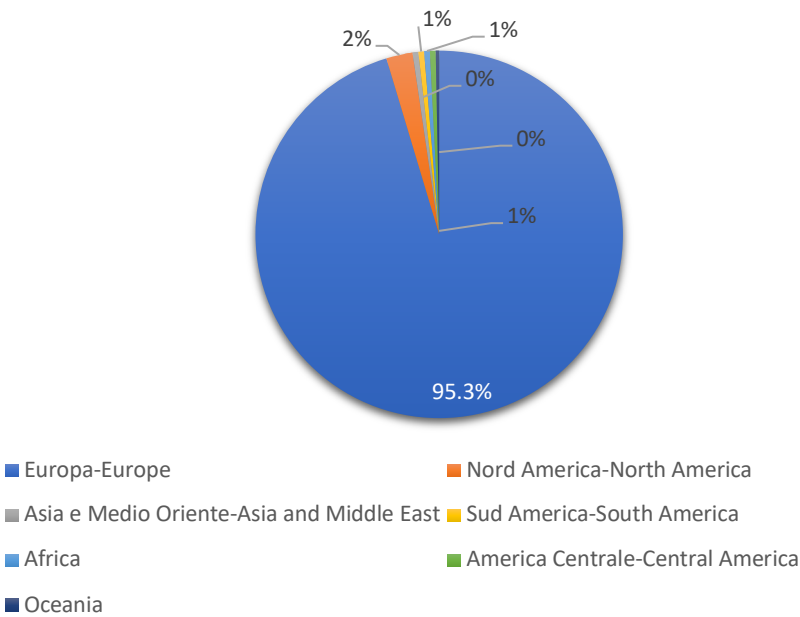

Hai conseguito la laurea in fisioterapia?--Did you have bachelor's degree in Physical Therapy?

408 risposte

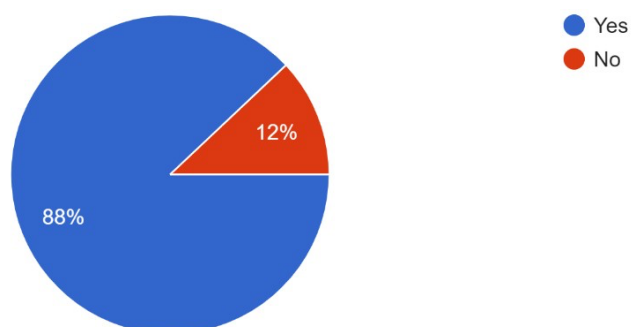

Hai conseguito la laurea in osteopatia?--Did you have bachelor's degree in osteopathy?

407 risposte

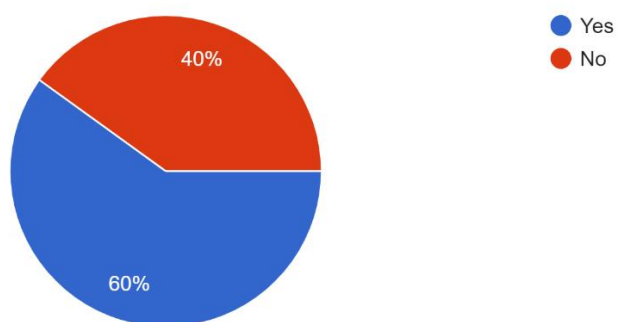

Qual è la tua qualifica?-What is your profession? 407 risposte

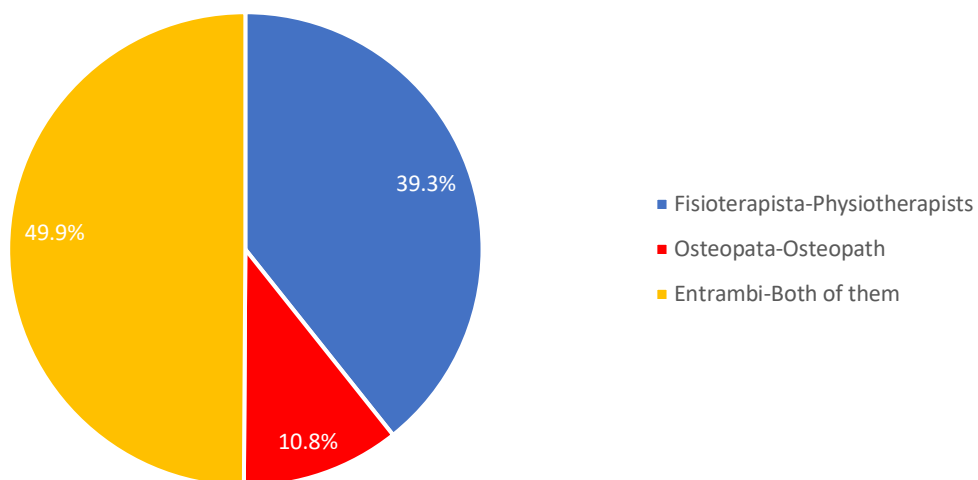

**Stai esercitando la professione? - Are you currently in practice ? 404 risposte**

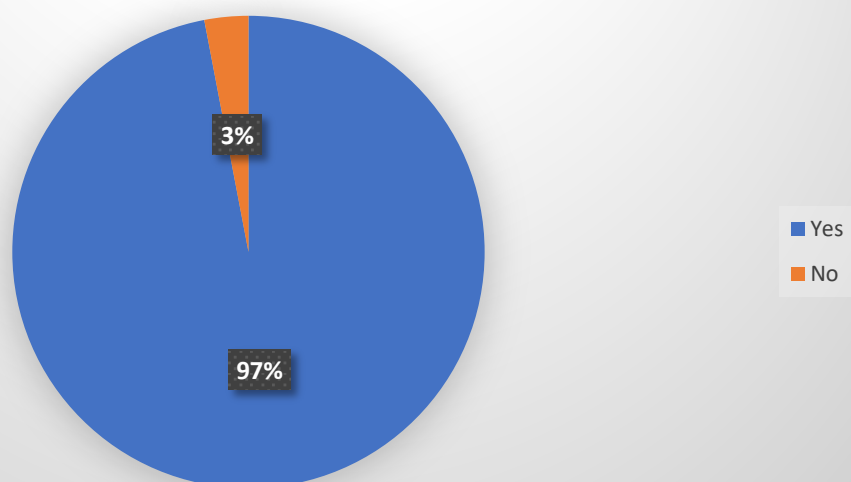

Hai mai seguito un corso di formazione continuo su disturbi temporo-mandibolari (TMD)?--Have you ever taken a continuing education course on temporomandibular disorders (TMD) ?  
406 risposte

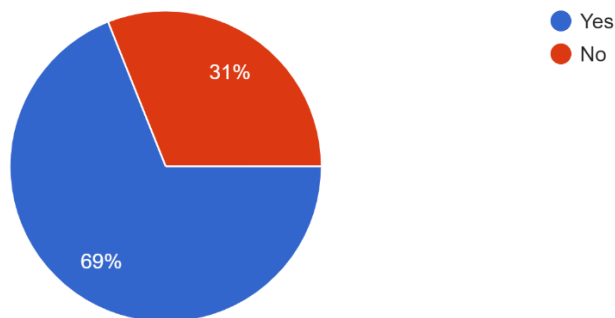

**Quale è la percentuale all'incirca dei tuoi pazienti che soffre di disordini temporo-mandibolari?--What percentage of your patients would you estimate suffer from TMD symptoms? 408 risposte**

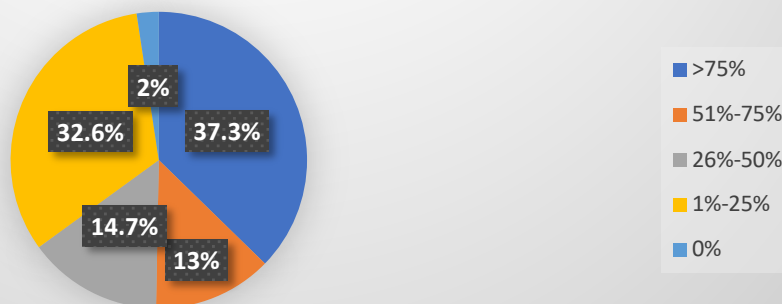

**Ti capita di indirizzare da altri specialisti i tuoi pazienti affetti da DTM?-Do you refer patients with TMD to other practitioners?**  
**405 risposte**

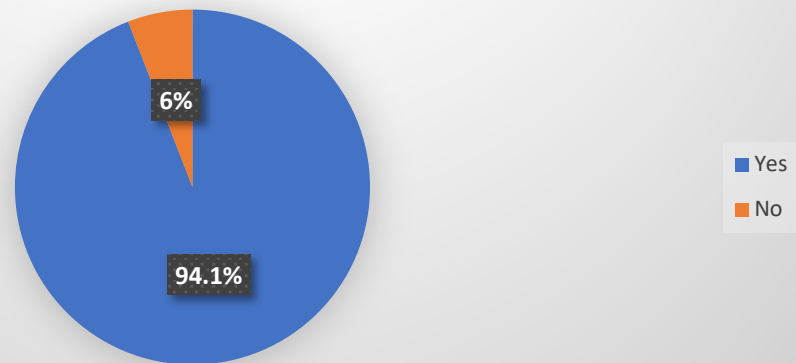

**Quale percentuale di pazienti riferisci ad altri specialisti per altre tipologie di trattamento?-What percentage of these patients do you refer to other specialists for other kinds of therapies?** 404 risposte

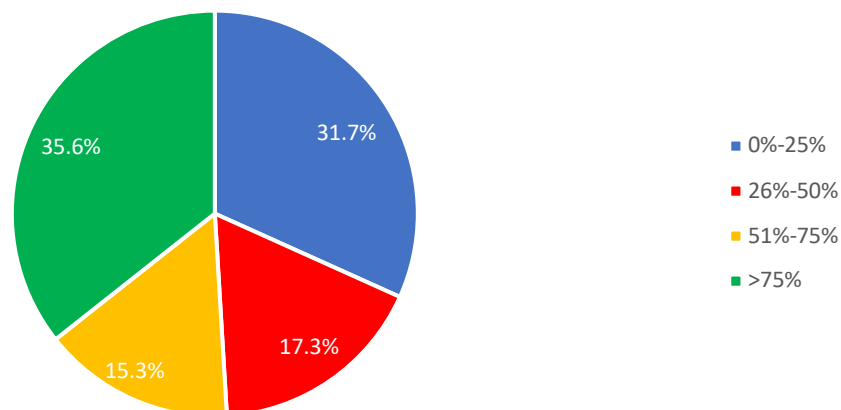

**Before this survey, were you aware that physiotherapists/ osteopaths can treat patients with TMD, for example by reducing movement and restoring masticatory function?**

**Prima di questo sondaggio eri a conoscenza che i fisioterapisti / osteopati possono curare i pazienti con TMD, ad esempio rieducando il movimento e ripristinando la funzione masticatoria?**

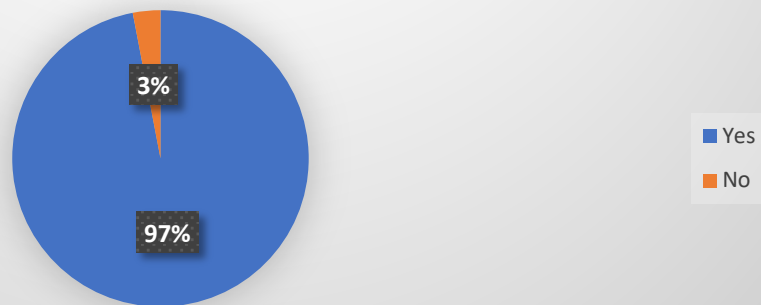

Ritieni di aver ricevuto informazioni adeguate/educazione sulla TMD durante il percorso universitario?-Do you feel that you received adeq... information/education on TMD while university? 407 risposte

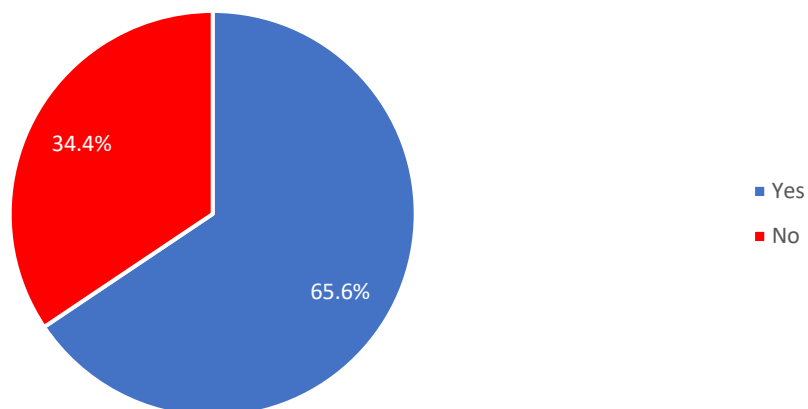

Ti senti sicuro nel trattare un paziente con DTM?-Do you feel confident treating a patient with TMD?406 risposte

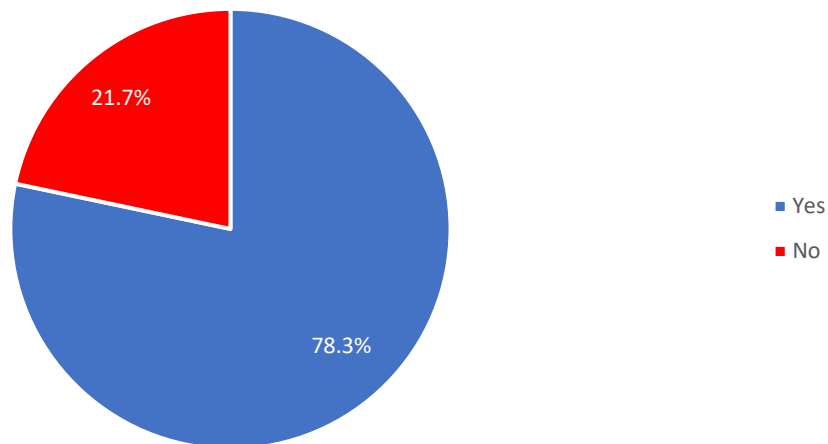

**Prima di questo sondaggio, sapevi che gli approcci collaborativi tra fisioterapisti/osteopati e dentisti nel trattamento dei pazienti con DTM hanno...**  
**TMD have resulted in better patient...**

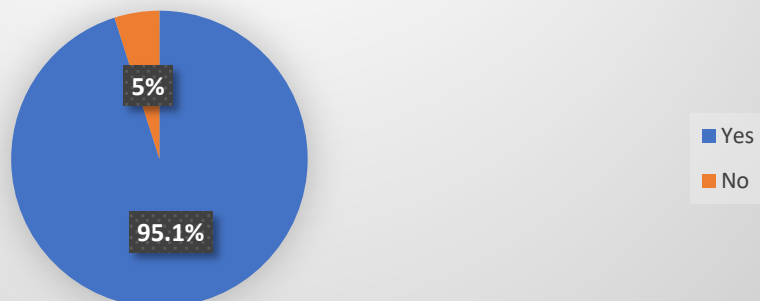

**Prima di questo sondaggio, eri a conoscenza del fatto che la terapia riabilitativa come esercizi, terapia manuale e rieducazione posturale per DTM sia risultata efficace?--**  
**Prior to this survey, were you aware that...**

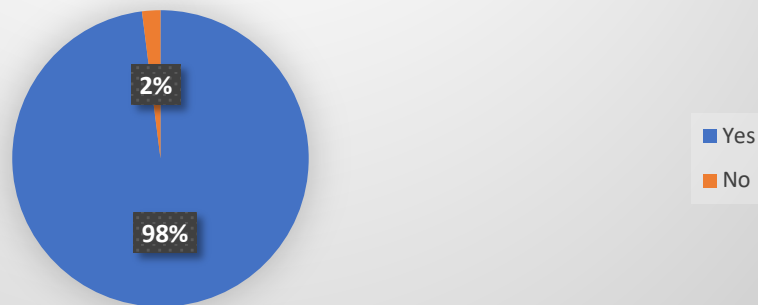

**Saresti interessato a saperne di più sulla ricerca attuale sul trattamento fisioterapico conservativo per i pazienti con TMD?-Would you be interested i.... physical therapy treatment for patients with TMD?405...**

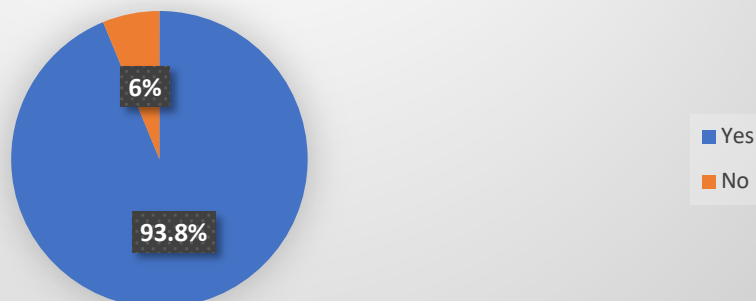

Supplement: s1 [file s1]
